# Supplementary figures and images for: Visualization and analysis of RNA-Seq assembly graphs
Source: Oxford University Press journal article supplement (doi:10.1093/nar/gkz599), 2019-07-10

**A**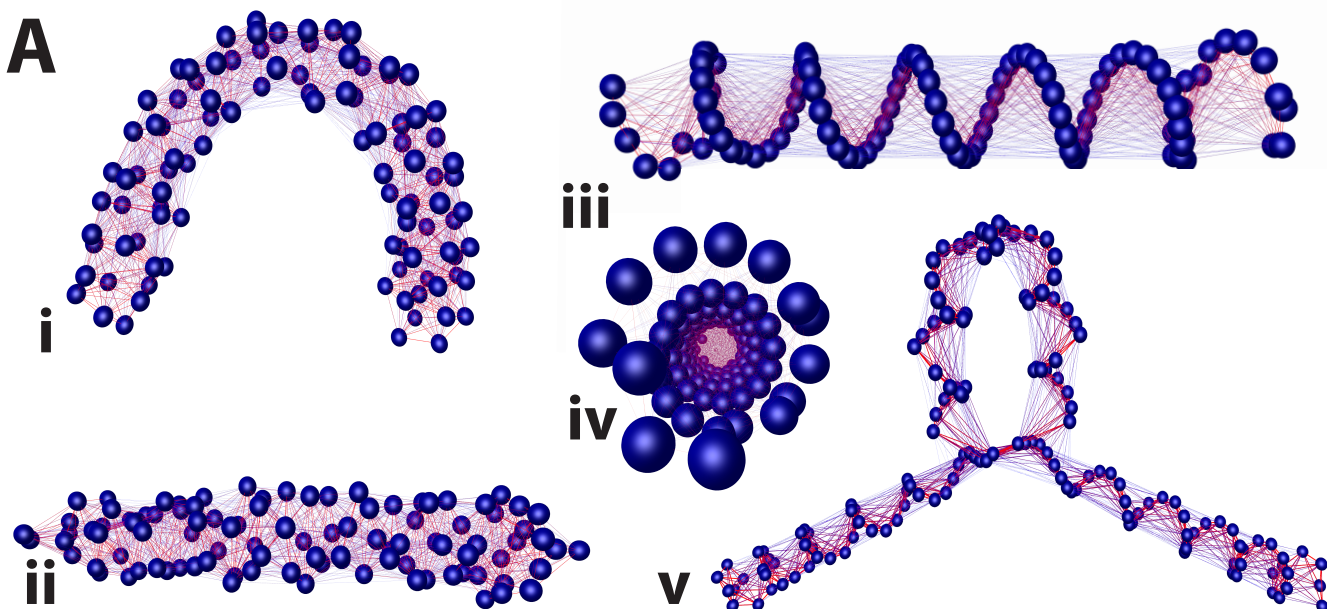**B**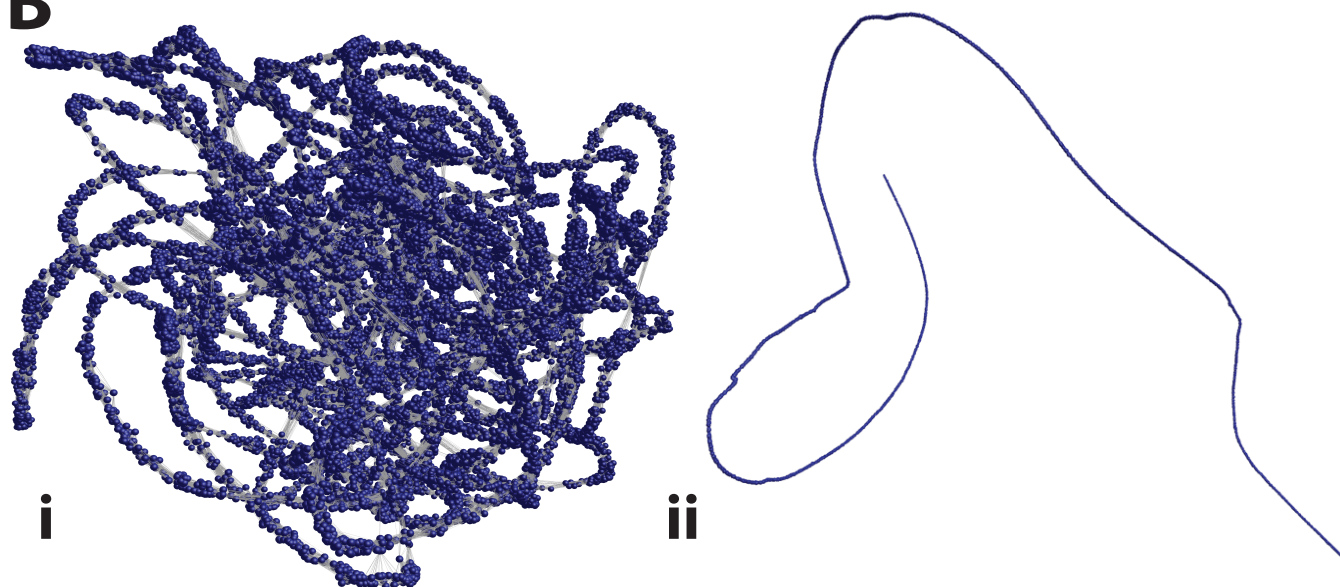

Supplement: gkz599_supplemental_files.zip [file gkz599_supplemental_files.zip]
